# Supplementary material for: The validity and reliability of the “My Jump App” for measuring jump height of the elderly
Source: PeerJ. 2018 Oct 15;6:e5804. doi: 10.7717/peerj.5804 (PMC6193468; doi:10.7717/peerj.5804)
Supplement: Supplemental Information 1 [file peerj-06-5804-s001.xlsx]

## Sheet: Plan1
ID	Gender	Boby mass (kg)	Height (m)	Contact 1 (cm)	Contact 2 (cm)	Contact 3 (cm)	MyJUmp 1 (cm)	MyJUmp 2 (cm)	MyJUmp 3 (cm)
1	male	74	1.63	4.2	4.6	5.16	5	5.3	5.76
2	male	82	1.64	10.4	11	13.47	10.56	11.15	13.63
3	male	58	1.6	2.33	2.3	2.1	2.48	2.5	2.31
4	male	62	1.5	16.3	16	15.2	16.4	16.1	15.3
5	male	79	1.57	19.1	20.5	20.5	19.1	20.3	20.4
6	male	72	1.64	12.4	15.7	17	12.53	15.85	18
7	male	61	1.62	22.8	24.3	25.5	23.03	24.43	25.8
8	male	51	1.57	8.7	11.1	11.75	8.86	11.22	13.2
9	male	89	1.71	6	6.26	6.15	6	6.06	6.3
10	male	55	1.57	6.4	6.4	6.4	6.3	6.4	6.55
11	famele	85	1.54	10	10	10.1	9.9	9.8	9.9
12	famele	97	1.58	5	6.8	7	5.09	6.82	7
13	famele	70	1.52	4.6	2.3	4.2	4.48	2.22	4.2
14	famele	61	1.62	14	14.2	14.5	14.3	14.54	14.8
15	famele	57	1.57	15.8	17.6	17.7	16	17.811	17.91
16	famele	38	1.49	4.3	4.3	4.3	4.1	4.3	4.4
17	famele	58	1.63	7.1	6.4	8.7	7.28	6.57	8.87
18	famele	53	1.58	7.2	6.7	9.1	7.33	6.86	9.23
19	famele	63	1.67	6.7	8	10.4	7.27	8.51	10.9
20	famele	56	1.59	8	8.2	9	8.2	8.35	9
21	famele	81	1.71	6.2	8.9	9.4	6.42	9.1	9.61
22	famele	44	1.52	10	9.6	10.4	10.14	9.7	10.5
23	famele	54	1.56	13.5	8	10.25	13.67	8.167	10.42
24	famele	75	1.58	9.9	11.2	11.2	10.1	11.41	11.41
25	famele	64	1.55	5.6	5.6	3.7	5.42	5.45	3.47
26	famele	65	1.54	6.3	6.3	6.7	6.19	6.18	6.58
27	famele	65	1.61	11	11	11.6	11.115	11.11	11.71
28	famele	57	1.59	4.1	4.1	3.2	4	4.1	3.2
29	famele	66	1.68	9.2	6.4	7.5	9.11	6.34	7.42
30	famele	68	1.56	13	13	13	13.21	13.21	13.2
31	famele	73	1.61	10.7	9	10.5	11	9.3	10.8
32	famele	86	1.68	3.3	3.1	4.2	3.17	2.94	4.02
33	famele	81	1.67	9	9	7.6	9.1	9.25	7.81
34	famele	66	1.57	9.4	9.4	9.3	9.4	9.55	9.35
35	famele	68	1.64	13.8	15.69	11.2	13.95	15.83	11.342
36	famele	56	1.54	8.2	8.2	8	8.14	8.13	7.935
37	famele	55	1.56	9.6	6.8	9.4	9.54	6.9	9.36
38	famele	74	1.63	6.3	6.2	5.7	6.1	6	5.7
39	famele	79	1.61	18	17.6	18.1	18.41	18.09	18.49
40	male	58	1.62	18.4	21.7	22	19	22	22.57
41	male	71	1.72	14	11.6	13.8	14.38	11.92	14.16
